# Supplementary material
Source: PubMed Central journal article supplement (PMC6426920)
Supplement: 12264_2018_300_MOESM1_ESM.pdf [file 12264_2018_300_MOESM1_ESM.pdf]

Supplementary Material

### Phosphorylated TDP-43 Staging of Primary Age-Related Tauopathy

Xiaoling Zhang<sup>1#</sup>, Bing Sun<sup>1#</sup>, Xing Wang<sup>2#</sup>, Hui Lu<sup>1</sup>, Fangjie Shao<sup>2</sup>, Annemieke J.M. Rozemuller<sup>3</sup>, Huazheng Liang<sup>4</sup>, Chong Liu<sup>1,2</sup>, Jiadong Chen<sup>1</sup>, Manli Huang<sup>5</sup>, Keqing Zhu<sup>1,2\*</sup>

**Table S1. pTDP-43-positive structures in the aging control cases**

| Case no. | Age | Sex | Diagnosis             | Amyg | EC | Sub | CA | DG |
|----------|-----|-----|-----------------------|------|----|-----|----|----|
| 1        | 50  | M   | Diabetes mellitus     | -    | -  | -   | -  | -  |
| 2        | 52  | M   | Myocarditis           | -    | -  | -   | -  | -  |
| 3        | 53  | M   | Myocardial infarction | -    | -  | -   | -  | -  |
| 4        | 56  | F   | Cirrhosis             | -    | -  | -   | -  | -  |
| 5        | 56  | M   | Brain hemorrhage      | -    | -  | -   | -  | -  |
| 6        | 58  | F   | Schizophrenia         | -    | -  | -   | -  | -  |
| 7        | 58  | F   | Pneumonia             | -    | -  | -   | -  | -  |
| 8        | 68  | M   | Myocardial infarction | -    | -  | -   | -  | -  |
| 9        | 70  | M   | Brain hemorrhage      | -    | -  | -   | -  | -  |

Normal elderly: Braak NFT stage = 0 and CERAD SP density = 0.

Amyg, amygdala; EC, entorhinal cortex; Sub, subiculum; CA, cornu ammonis; DG, dentate gyrus.  
-, None
